# Supplementary material
Source: publisher figshare collection journal article supplement (https://acs.figshare.com/ndownloader/files/13025393)
Supplement: Supplementary file 1 [file 13025393]

## Supplementary Information

# VO<sub>2</sub>(M)@SiO<sub>2</sub>/Poly(N-isopropylacrylamide) Hybrid Nanothermochromic Microgels for Smart Window

*Yu Wang,<sup>a</sup> Fang zhao,<sup>a\*</sup> Jie Wang,<sup>a</sup> Ali Raza Khan,<sup>a</sup> Yulin Shi,<sup>b</sup> Zhang Chen,<sup>c</sup>*

*Kaiqiang Zhang,<sup>c</sup> Li Li,<sup>a</sup> Yanfeng Gao,<sup>cd\*</sup> Xuhong Guo<sup>ab\*</sup>*

<sup>a</sup>State Key Laboratory of Chemical Engineering, East China University of Science and Technology, Shanghai 200237, China. E-mail: [guoxuhong@ecust.edu.cn](mailto:guoxuhong@ecust.edu.cn)

<sup>b</sup>Engineering Research Center of Materials Chemical Engineering of Xinjiang Bingtuan, Key Laboratory of Materials Chemical Engineering of Xinjiang Uygur Autonomous Region, Shihezi University, Shihezi 832000, China.

<sup>c</sup>School of Materials Science and Engineering, Shanghai University, Shanghai 200444, China.

<sup>d</sup>School of Materials Science and Energy Engineering, Foshan University, Foshan 528000, China.

\*To whom correspondence should be addressed. E-mail: fzhao1@ecust.edu.cn (Fang Zhao, co-corresponding author), yfgao@shu.edu.cn (Yanfeng Gao, co-corresponding author), guoxuhong@ecust.edu.cn (Xuhong Guo, co-corresponding author)

## 1.1 The X-ray diffraction pattern of VO<sub>2</sub>(M) and VO<sub>2</sub>(M)@SiO<sub>2</sub>

We verified the crystalline phase of VO<sub>2</sub> in nanoparticles (NPs) of VO<sub>2</sub>(M) and VO<sub>2</sub>(M)@SiO<sub>2</sub> by X-ray diffraction (XRD), respectively. As shown in Fig. S1, all the diffraction peaks of the VO<sub>2</sub>(M)@SiO<sub>2</sub> sample corresponded to those of monoclinic VO<sub>2</sub>(M) (JCPDS no.043-1051), without a broad reflection peak from  $2\theta=20^\circ$  to  $2\theta=30^\circ$  which can be assigned to non-uniformity of the SiO<sub>2</sub> shell. The unchanged XRD pattern also confirmed the chemical stability of VO<sub>2</sub>(M) is stable during modifying process.

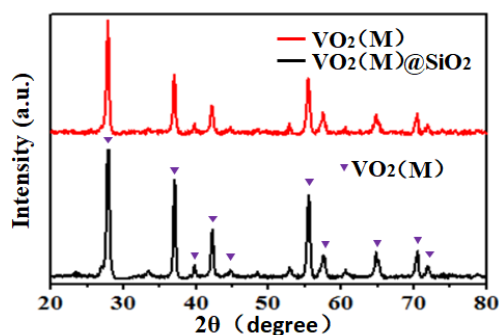

**Figure S1.** XRD results of the VO<sub>2</sub>(M) NPs and VO<sub>2</sub>(M)@SiO<sub>2</sub> NPs.

## 1.2 Effect of Surfactant Type on VO<sub>2</sub>(M) Dispersion

Figs. S2 show the stability of solvent prepared with two kinds of surfactant: sodium dodecyl sulfate (SDS) and poly(vinylpyrrolidone) (PVP). It can be seen that all the VO<sub>2</sub> NPs subsided in both SDS systems with two different contents of VO<sub>2</sub> NPs (Figs. S2a and b), while VO<sub>2</sub> NPs were all well dispersed in the existence of PVP polymer (Figs. S2c and d).

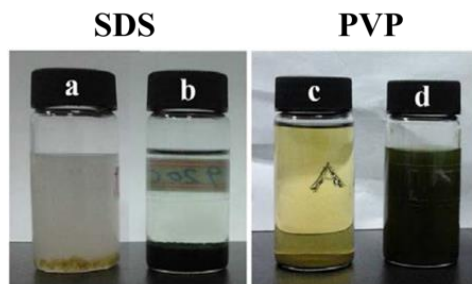

**Figure S2.** Composite microgels synthesized with different surfactants and varying amounts of VO<sub>2</sub>(M) nanoparticles: (a) SDS, 0.05 wt% VO<sub>2</sub>(M); (b) SDS, 0.1 wt% VO<sub>2</sub>(M); (c) PVP, 0.05 wt% VO<sub>2</sub>(M); (d) PVP, 0.1 wt% VO<sub>2</sub>(M).

### 1.3 The transparent-opaque transition of the smart window

Before or after phase transition, all the hybrid microgels (samples I, II and III) were kept transparent and homogeneous, without any precipitation phenomenon. At room temperature, the hybrids were transparent, and brownish due to the existence of VO<sub>2</sub>(M) NPs (left column of Fig. S3). The color of films changed with VO<sub>2</sub>(M) content: the higher the VO<sub>2</sub>(M) content was, the deeper the brownish color was.

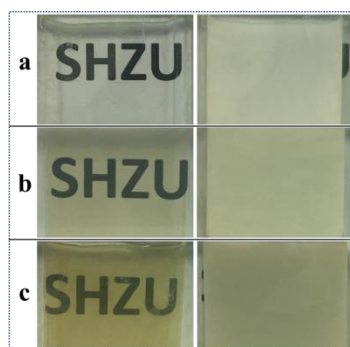

**Figure S3.** Pictures of different hybrid microgel samples (a) sample I, (b) sample II, (c) sample III at 20 °C (left column) and 50 °C (right column).

## 1.4 The phase transition behavior of VO<sub>2</sub> and VO<sub>2</sub>@SiO<sub>2</sub>

The pure VO<sub>2</sub>(M) nanoparticles were synthesized through a “heating-up” process. According to the DSC (Differential scanning calorimeter) results, the phase transition began at 60 °C and ended at 100 °C. The latent heat during the insulator-to-metal transition (IMT) of VO<sub>2</sub>(M) NPs is around 43 J g<sup>-1</sup>. This high crystal quality will achieve strong solar energy regulation ability. The transition temperature of the nanoparticle remained unchanged after being coated by SiO<sub>2</sub> (VO<sub>2</sub>(M)@SiO<sub>2</sub>, solid lines).

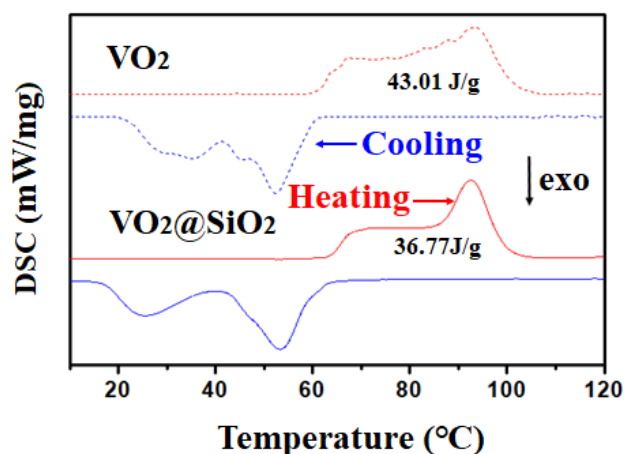

**Figure S4.** DSC curves as function of temperature upon heating (red lines) or cooling (blue lines) for VO<sub>2</sub> (dashed lines) and VO<sub>2</sub>@SiO<sub>2</sub> (solid lines). The latent heat of VO<sub>2</sub> and VO<sub>2</sub>@SiO<sub>2</sub> are shown as the inserts.

## 1.5 The optical performance of Sample I, II and III and pure PNIPAm microgel

Optical properties between pure PNIPAm microgel and hybrids (Sample I, II and III) are shown in Table S1.

**Table S1.** Comparison of the optical properties for Sample I, II, III with PNIPAm microgel.

| Sample     | $T_{\text{lum,low}}$ (%) | $T_{\text{lum,high}}$ (%) | $\Delta T_{\text{lum}}$ (%) | $T_{\text{lum,average}}$ (%) | $\Delta T_{\text{IR}}$ (%) | $\Delta T_{\text{sol}}$ (%) |
|------------|--------------------------|---------------------------|-----------------------------|------------------------------|----------------------------|-----------------------------|
| PNIPAm     | 67.0                     | 1.6                       | 65.3                        | 34.3                         | 29.4                       | 64.9                        |
| Sample I   | 72.7                     | 1.7                       | 71.0                        | 37.2                         | 26.7                       | 64.9                        |
| Sample II  | 59.7                     | 1.3                       | 58.4                        | 30.5                         | 23.4                       | 55.3                        |
| Sample III | 75.6                     | 1.3                       | 74.3                        | 38.4                         | 22.4                       | 62.7                        |

## 1.6 TEM image of hybrids with 4 g/L PVP content

As shown in Fig. S5, there existed a thick gel layer which was caused by the high content of PVP. Therefore, a high PVP concentration will influence the hybrid structure and make the structure change from microgel to large-sized hydrogel to some extent. The large-size hydrogel shows a long response time and a relatively small reduction of transmission in both visible and IR ranges after phase transition, as reported by the literatures (Zhou, Y; Cai, Y.-F.; Hu, X.; Long, Y. Temperature-responsive hydrogel with ultra-large solar modulation and high luminous transmission for “smart window” applications. *J. Mater. Chem. A* **2014**, 2, 13550-13555.). Thus a high PVP concentration is not favorable for achieving good optical performance of the hybrid microgel.

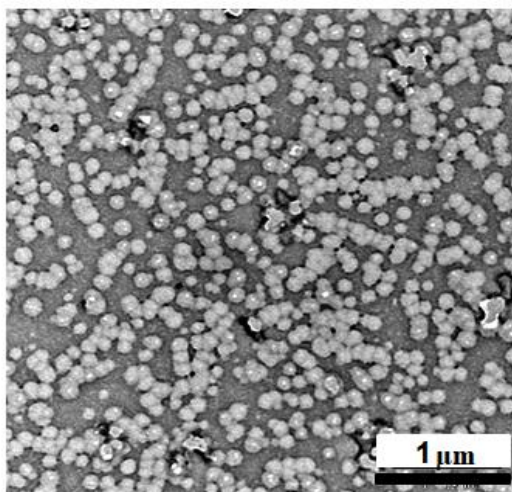

**Figure S5.** TEM image of hybrids obtained from 4 g/L PVP content.

### **1.7 Comparison of optical performance of previously reported results and my hybrid sample**

As shown in Table, comparing with the result of given reviews, our composite film shows the excellent solar modulation properties (62.7%) with high luminous transmittance (75.6%). But we also have some short comings, the high solar modulation properties sacrificed the luminous transmittance at high temperature, which means that we need extra energy to keep visible transmittance for views.

**Table S2.** Comparison of our hybrid sample with other thermochromic materials ( “-” means data is not available).

| Category                             | Sub-category                                 | Material content                                        | Modulated solar spectrum (nm) | $T_{lum}(\%)$ | $\Delta T_{sol}(\%)$ | Ref.      |
|--------------------------------------|----------------------------------------------|---------------------------------------------------------|-------------------------------|---------------|----------------------|-----------|
| Unhybridized system                  | VO <sub>2</sub>                              | VO <sub>2</sub>                                         | 700-2500                      | 45.6          | 22.3                 | 1         |
|                                      |                                              | W+Zr-doped VO <sub>2</sub>                              | 700-2500                      | 56.4          | 12.3                 | 2         |
|                                      | Hydrogel                                     | PNIPAm                                                  | 250-2200                      | 70.7          | 25.5                 | 3         |
|                                      |                                              | Modified cellulose                                      | 250-2200                      | 67.4          | 25.7                 | 4         |
|                                      |                                              | Modified starch                                         | 250-2200                      | 87.7          | 40.1                 | 5         |
|                                      | Metamaterial                                 | Kiri-Kirigami metamaterials                             | 200-2200                      | -             | -                    | 6         |
|                                      | Perovskite                                   | Halide perovskite                                       | 400-700                       | -             | -                    | 7         |
|                                      | Liquid crystal                               | -                                                       | 400-2200                      | -             | -                    | 8         |
| VO <sub>2</sub> -based hybrid system | The other material is non-thermal-responsive | VO <sub>2</sub> /PU                                     | 700-2500                      | 45.6          | 22.3                 | 1         |
|                                      |                                              | VO <sub>2</sub> /Si-Al gel                              | 700-2500                      | 59.1          | 12                   | 9         |
|                                      |                                              | VO <sub>2</sub> /PDMS                                   | 700-2500                      | 85            | -                    | 10        |
|                                      |                                              | VO <sub>2</sub> /TiO <sub>2</sub>                       | 700-2500                      | 61.2          | 14.6                 | 11        |
|                                      | The other material is thermal-responsive     | VO <sub>2</sub> /PNIPAm                                 | 250-2500                      | 62.6          | 34.7                 | 12        |
|                                      |                                              | VO <sub>2</sub> /HPC                                    | 250-2500                      | 56            | 36                   | 13        |
|                                      |                                              | VO <sub>2</sub> /NLETS                                  | 500-2500                      | 71            | 18.2                 | 14        |
|                                      |                                              | Our composite VO <sub>2</sub> @SiO <sub>2</sub> /PNIPAm | 250-2500                      | 75.6          | 62.7                 | This work |

## 1.8 References

(1) Chen, Z.; Gao, Y.; Kang, L.; Cao, C.; Chen, S.; Luo, H. Fine crystalline VO<sub>2</sub> nanoparticles: Synthesis, abnormal phase transition temperatures and excellent optical properties of a derived VO<sub>2</sub> nanocomposite foil. *J. Mater. Chem. A*. **2014**, 2, 2718-2727.

(2) Shen, N.; Chen, S.; Chen, Z.; Liu, X.; Cao, C.; Dong, B.; Luo, H.; Liu, J.; Gao, Y. The synthesis and performance of Zr-doped and W–Zr-codoped VO<sub>2</sub> nanoparticles and derived flexible foils. *J. Mater. Chem. A*. **2014**, 2, 15087-15093.

(3) Zhou, Y.; Cai, Y.; Hu, X.; Long, Y. Temperature-responsive hydrogel with ultra-

large solar modulation and high luminous transmission for “smart window” applications. *J. Mater. Chem. A*. **2014**, 2, 13550-13555.

(4) Yang, Y.-S.; Zhou, Y.; Yin Chiang, F. B.; Long, Y. Temperature-responsive hydroxypropylcellulose based thermochromic material and its smart window application. *RSC Adv*. **2016**, 6, 61449-61453.

(5) Zhang, K.; Shi, Y.; Wu, L.; Chen, L.; Wei, T.; Jia, X.; Chen, Z.; Li, M.; Xu, Y.; Wang, Y.; Gao, Y.; Guo, X. Thermo- and pH-responsive starch derivatives for smart window. *Carbohydr. Polym.* **2018**, 196, 209-216.

(6) Tang, Y.; Lin, G.; Yang, S.; Yi, Y. K.; Kamien, R. D.; Yin, J. Programmable Kiri-Kirigami Metamaterials. *Adv. Mater.* **2017**, 29, 1604262.

(7) Lin, J.; Lai, M.; Dou, L.; Kley, C. S.; Chen, H.; Peng, F.; Sun, J.; Lu, D.; Hawks, S. A.; Xie, C.; Cui, F.; Alivisatos, A. P.; Limmer, D. T.; Yang, P. Thermochromic halide perovskite solar cells. *Nat. Mater.* **2018**, 17, 261-267.

(8) Liang, X.; Guo, S.; Chen, M.; Li, C.; Wang, Q.; Zou, C.; Zhang, C.; Zhang, L.; Guo, S.; Yang, H. A temperature and electric field-responsive flexible smart film with full broadband optical modulation. *Mater. Horiz.* **2017**, 4, 878-884.

(9) Liu, C.; Cao, X.; Kamyshny, A.; Law, J. Y.; Magdassi, S.; Long, Y. VO(2)/Si-Al gel nanocomposite thermochromic smart foils: largely enhanced luminous transmittance and solar modulation. *J. Colloid Interface Sci.* **2014**, 427, 49-53.

(10) Moot, T.; Palin, C.; Mitran, S.; Cahoon, J. F.; Lopez, R. Designing Plasmon-Enhanced Thermochromic Films Using a Vanadium Dioxide Nanoparticle Elastomeric Composite. *Adv. Opt. Mater.* **2016**, 4, 578-583.

(11) Chen, Z.; Cao, C.; Chen, S.; Luo, H.; Gao, Y. Crystallised mesoporous TiO<sub>2</sub>(A)–VO<sub>2</sub>(M/R) nanocomposite films with self-cleaning and excellent thermochromic properties. *J. Mater. Chem. A*. **2014**, 2, 11874-11884.

(12) Zhou, Y.; Cai, Y.; Hu, X.; Long, Y., VO<sub>2</sub>/hydrogel hybrid nanothermochromic material with ultra-high solar modulation and luminous transmission. *J. Mater. Chem. A*. **2015**, 3, 1121-1126.

(13) Yang, Y.-S.; Zhou, Y.; Chiang, F. B. Y.; Long, Y. Tungsten doped VO<sub>2</sub>/microgels hybrid thermochromic material and its smart window application. *RSC Adv.* **2017**, 7, 7758-7762.

(14) Zhu, J.; Huang, A.; Ma, H.; Chen, Y.; Zhang, S.; Ji, S.; Bao, S.; Jin, P. Hybrid films of VO<sub>2</sub> nanoparticles and a nickel(ii)-based ligand exchange thermochromic system: excellent optical performance with a temperature responsive colour change. *New J. Chem.* **2017**, 41, 830-835.
